# Supplementary material for: The onset of grapevine berry ripening is characterized by ROS accumulation and lipoxygenase-mediated membrane peroxidation in the skin
Source: PubMed Central journal article supplement (PMC4021102; doi:10.1186/1471-2229-14-87), 2014-04-02
Supplement: 1471-2229-14-87-S1.pdf [file 1471-2229-14-87-S1.pdf]

"The onset of grapevine berry ripening is characterized by ROS accumulation and lipoxygenase-mediated membrane peroxidation in the skin"

by Pilati S, Brazzale D, Guella G, Milli A, Ruberti C, Biasioli F, Zottini M and Moser C

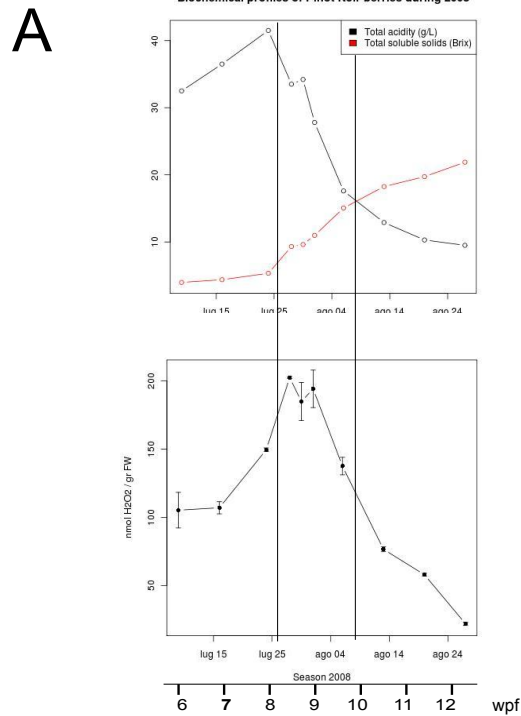

**Additional file 1A: Biochemical profiles and H<sub>2</sub>O<sub>2</sub> content in Pinot Noir grape berry skin during 2008.** The acidic and soluble solids profiles allow to set véraison (interval indicated by the two vertical lines). H<sub>2</sub>O<sub>2</sub> content in skin samples has been assayed with Amplex Red (Molecular Probes). *n*=3, bars represent standard error.

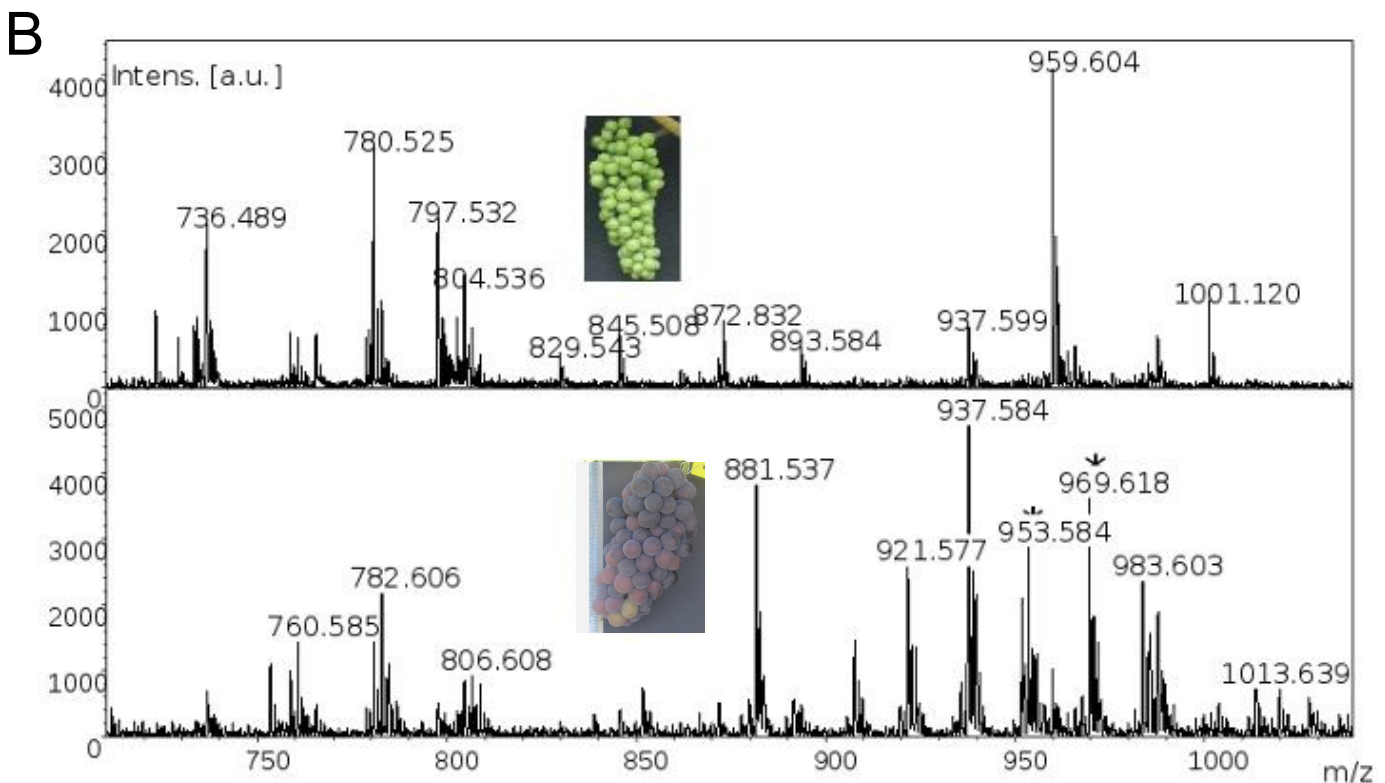

**Additional file 1B: Galactolipid peroxidation in Pinot Noir grape berry skin sampled during 2008 analyzed by positive MALDI-TOF.** Spectra of raw lipid extracts of green hard berry skin samples at 7 wpf (July, 16th, top) and berry skin samples at véraison, 9 wpf (August, 1st, bottom) are shown. The ions at the nominal *m/z* 953 and 969 (\*) in the véraison sample have been assigned as [M+H+O]<sup>+</sup> and [M+H+2O]<sup>+</sup> of the corresponding [M+H]<sup>+</sup> ion at *m/z* 937 in the green hard berry sample, which has been attributed to native DGDG 18:3/18:3.
