# Supplementary material for: The onset of grapevine berry ripening is characterized by ROS accumulation and lipoxygenase-mediated membrane peroxidation in the skin
Source: PubMed Central journal article supplement (PMC4021102; doi:10.1186/1471-2229-14-87), 2014-04-02
Supplement: 1471-2229-14-87-S3.pdf [file 1471-2229-14-87-S3.pdf]

Update of the LOX family described in Podolyan et al., 2011 to the new genome annotation (12X, V1)

| ID (Podolyan et al., 2011) | Gene name (12X, V1 annotation)  | Chromosome (strand) | Predicted protein length | Predicted functionality |
|----------------------------|---------------------------------|---------------------|--------------------------|-------------------------|
| VvLOXA                     | Vv06s0004g01510                 | Chr 6(-)            | 901                      | chlor 13-LOX            |
| VvLOXB                     | Vv14s0128g00790                 | Chr 14(+)           | 869                      | 9-LOX                   |
| VvLOXC                     | Vv14s0128g00780                 | Chr 14(+)           | 859                      | 9-LOX                   |
| VvLOXE                     | Vv06s0004g01450                 | Chr 6(+)            | 859                      | 13-LOX                  |
| VvLOXF                     | Vv06s0004g01460                 | Chr 6(+)            | 598                      | 13-LOX                  |
| VvLOXG                     | Vv06s0004g01470                 | Chr 6(+)            | 903                      | 13-LOX                  |
| VvLOXH                     | Vv06s0004g01480                 | Chr 6(+)            | 793                      | 13-LOX                  |
| VvLOXI                     | Vv06s0004g01500                 | Chr 6(+)            | 791                      | 13-LOX                  |
| VvLOXJ                     | Vv13s0064g01480                 | Chr 13(+)           | 903                      | 13-LOX                  |
| VvLOXK                     | Vv13s0064g01490+Vv13s0064g01500 | Chr 13(+)           | 399+                     | 250 Pseudogene?         |
| VvLOXL                     | Vv05s0020g03170                 | Chr 5(+)            | 876                      | 9-LOX                   |
| VvLOXM                     | Vv06s0004g01580                 | Chr 6(-)            | 335                      | Pseudogene?             |
| VvLOXO                     | Vv09s0002g01080                 | Chr 9(+)            | 927                      | 13-LOX                  |
| VvLOXP                     | Vv01s0010g02750                 | Chr 1(-)            | 920                      | 13-LOX                  |
| VvLOXS                     | Vv00s0265g00170                 | Chr Un (-)          | 505                      | 13-LOX                  |

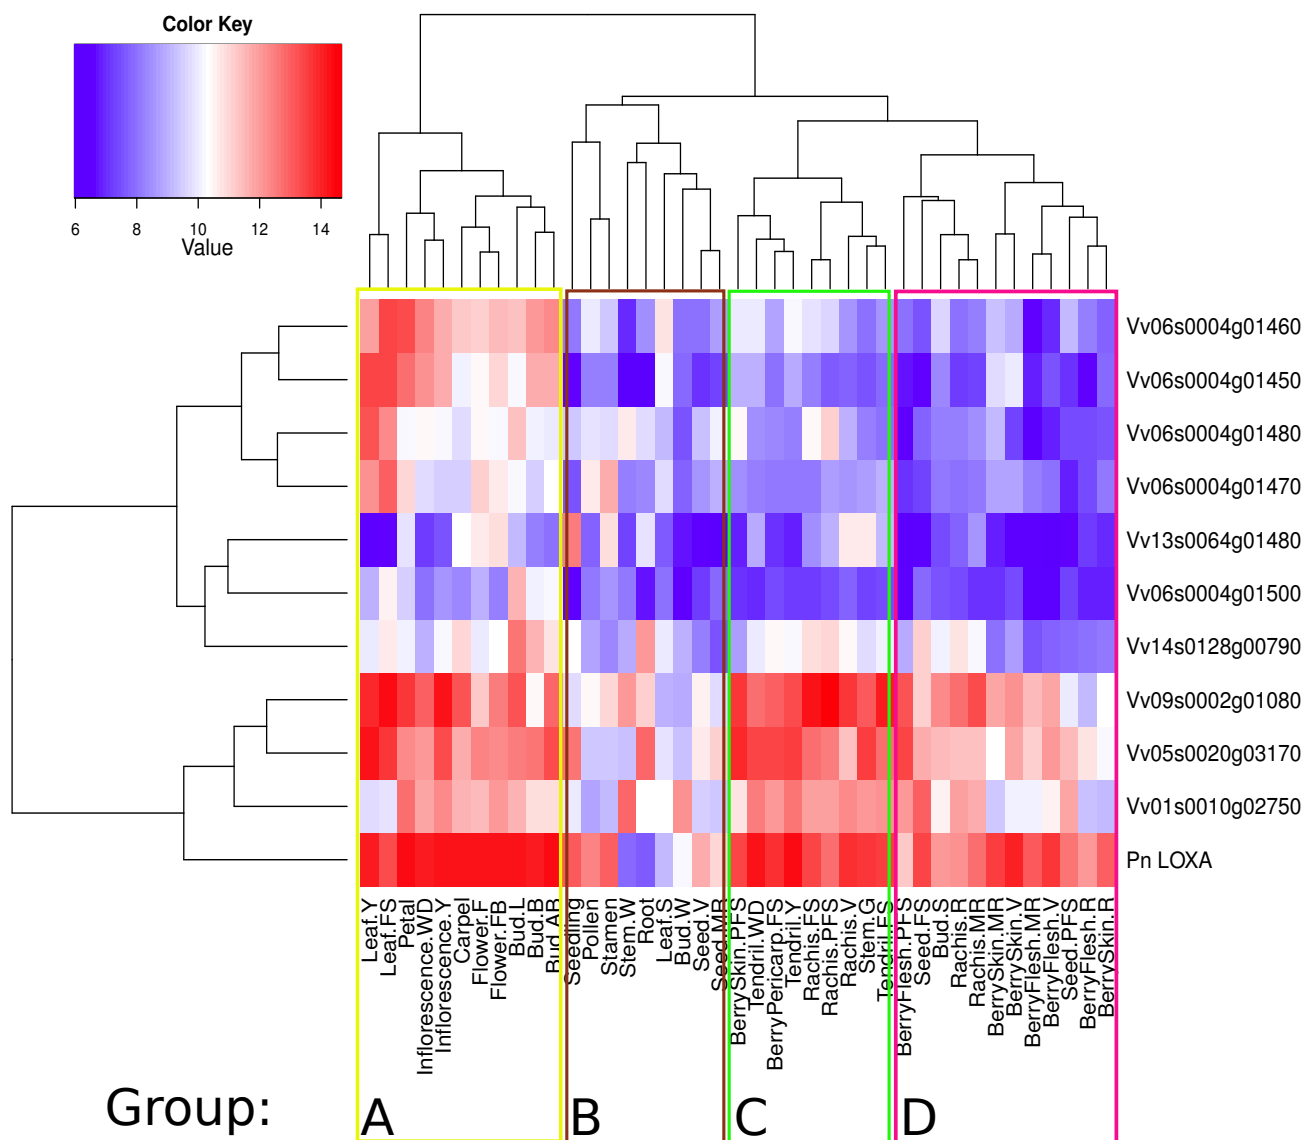

**Additional file 3A: Updated description of the *Vitis vinifera* LOX gene family described by Podolyan et al. (2012) and heatmap of the LOX gene family expression in the *V. vinifera* cv Corvina atlas (Fasoli et al., 2012).**

The lox sequences identified by Podolyan et al. (2012) have been updated with the gene ID of the *V. vinifera* genome 12Xv1 (Grimplet J et al., 2012 BMC Res Notes 5:213). In the heatmap, colors correspond to expression values as indicated in the scheme at top left. The most interesting organs/tissues were selected and reported on the columns. Predicted LOX genes (and PnLOXA) are shown on the right. VvLOXB and VvLOXC, on Chr 14, are 96% identical and the probes on the Nimblegene array are not specific enough to distinguish them. VvLOXS was not expressed in any sample and was therefore excluded from the heatmap analysis. Y: young; WD: well developed; Bud-L: latent bud; Bud-W: winter bud; Bud-S: bud swell; Bud-B: bud burst; Bud-AB: bud after burst; Flower-FB: flowering begins; Flower-F: flowering; S: senescent; FS: fruit set; PFS: post-fruit set; V: véraison; MR: mid-ripening; R: ripening; Stem-G: green stem; Stem-W: woody stem (Fasoli et al., 2012). Group A: samples in which nearly all the LOX genes are expressed (leaf, bud and inflorescence). Group B: samples in which there is a very LOX isoform-specific expression (non-photosynthetic tissues). Groups C and D: samples in which five LOX isoforms are significantly expressed and modulated (fruit, rachis and tendril).

**Lox genes expression in the berry flesh along ripening**

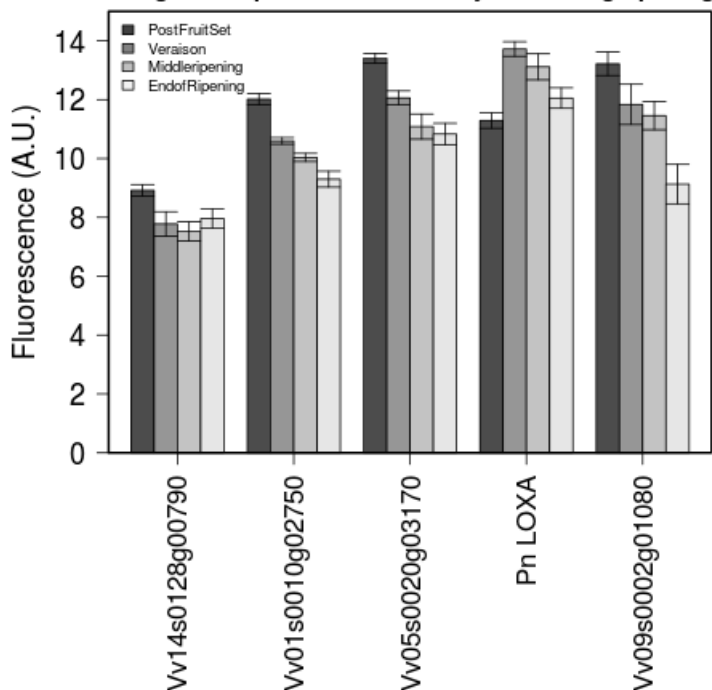

**Lox genes expression in the berry skin along ripening**

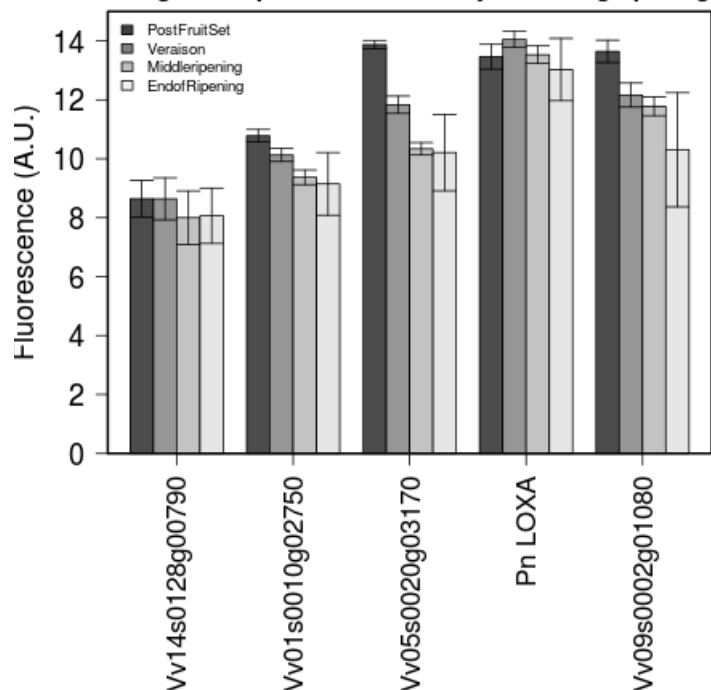

**Additional file 3B: Expression profiles of the 5 LOX isoforms expressed in the berry along ripening reported for *V. vinifera* cv Corvina in the atlas by Fasoli et al., 2012.** The fluorescence average value calculated on the probesets of each gene in the microarray experiments is reported on the y-axis. Bars represent the standard error. PnLOXA is the only isoform showing a specific induction at véraison stage.
